# Supplementary material for: Uracil-DNA-glycosylase-assisted loop-mediated isothermal amplification for detection of bacteria from urine samples with reduced contamination
Source: Royal Society of Chemistry journal article supplement (doi:10.1039/d0an01001d), 2020-01-01
Supplement: d0an01001d1.pdf [file d0an01001d1.pdf]

## 1 Supporting Information

### 2 Table S1. Details of targets

| ID | Target               | Gene          | NCBI accession | Amplicon length (bp) |
|----|----------------------|---------------|----------------|----------------------|
| 1  | <i>E. coli</i>       | <i>malB</i>   | NC_019072.1    | 204                  |
| 2  | <i>P. aeruginosa</i> | <i>oprL</i>   | Z50191.1       | 176                  |
| 3  | <i>K. pneumoniae</i> | <i>rcaA</i>   | NC_012731.1    | 191                  |
| 4  | <i>P. mirabilis</i>  | <i>ureR</i>   | Z18752.1       | 235                  |
| 5  | <i>E. faecalis</i>   | <i>Ef0027</i> | NC_004668.1    | 199                  |

3

### 4 Table S2. LAMP primers

| Gene                | Sequences (5' to 3')                          | References |
|---------------------|-----------------------------------------------|------------|
| <i>malB</i>         |                                               | 1          |
| F3                  | GCCATCTCCTGATGACGC                            |            |
| B3                  | ATTTACCGCAGCCAGACG                            |            |
| FIP                 | CATTTTGCAGCTGTACGCTCGCAGCCCATCATGAATGTTGCT    |            |
| BIP                 | CTGGGGCGAGGTCGTGGTATTCCGACAAACACCACGAAT T     |            |
| LF                  | CTTTGTAACAACCTGTCATCGACA                      |            |
| LB                  | ATCAATCTCGATATCCATGAAGGTG                     |            |
| <i>oprL</i>         |                                               | 2          |
| F3                  | GCGTTGCCGCCAACAATG                            |            |
| B3                  | GGATCTGGTTCTGCTGCT                            |            |
| FIP                 | GTTGTACCCACCTCCGGGCGGCAACGTTCTCTCC            |            |
| BIP                 | CTCCGTGCAGGGCGAACTGCAGGCGAGCCAACCTC           |            |
| LF                  | ACCTGCCGTGCCATACC                             |            |
| LB                  | GTTTCATGCAGCTCCAGCAG                          |            |
| <i>rcaA</i>         |                                               | 3          |
| F3                  | GGATATCTGACCAGTCCG                            |            |
| B3                  | GGTTTTGCGTAATGATCTG                           |            |
| FIP                 | CGACGTACAGTGTCTGAGTTTTAAAAAACAGGAAATC GTTGAGG |            |
| BIP                 | CGGCGGTGGTGTCTGAATTTGCGAATAATGCCATTAC TTTC    |            |
| LF                  | GAAGACTGTTTCGTGCATGATGA                       |            |
| <i>ureR</i> (P.m-3) |                                               | This study |
| F3                  | TGGTGCAAAGGTGAGAT                             |            |
| B3                  | ATAATCTGGAAGATGACGAGTA                        |            |
| FIP                 | TGTCACATCACAAGAACTTGACTAGTATTAATGGGCAAA       |            |

|               |                                                        |   |
|---------------|--------------------------------------------------------|---|
|               | CTATCACAG                                              |   |
| BIP           | TTCCCGACCAAACCGATTGAATTA-<br>TAATGGTTTGGAGTAAAGAGAACAC |   |
| LF            | TCAACGTGAGATTAGTGGTGA                                  |   |
| LB            | CATACCTTAGTACTGTCTGAAACTG                              |   |
| <hr/>         |                                                        |   |
| <i>Ef0027</i> |                                                        | 4 |
| F3            | ACAGAAAGCGATAGTCGTAGT                                  |   |
| B3            | CCTAAAAATGTTAGCTTTCGTGC                                |   |
| FIP           | TGGCTTCATCCATTTGTTGAAAACCTTTTCAAGCTATTACGC<br>AACAGT   |   |
| BIP           | AAGTCGCGGAAATGCTTAAAATG-<br>GTACAAATAGGAAAACCTGCCAC    |   |
| LF            | ATCTTGACATTGGCAATCA                                    |   |
| LB            | CGATTGAAGTGTTCCGGTGT                                   |   |

5

6 **Table S3. Primer screening for *Proteus mirabilis***

7

| Primer | Sequences (5' to 3')                               |
|--------|----------------------------------------------------|
| <hr/>  |                                                    |
| P.m-1  |                                                    |
| F3     | CGCCGATTACTCGTCATC                                 |
| B3     | TTTGGCTCATCATAATTTAAAACG                           |
| FIP    | GGTAGACATTGCTGAAGTAACGTAATTCCAGATTATCATCTATCAACAC  |
| BIP    | CCTCTCAAGAGACCCTGTTTATGCTATCGACCCCTTCGTGAT         |
| LF     | AGCCTCTTTTTTATTTTGGCTGGCGG                         |
| LB     | CGCCGATTACTCGTCATC                                 |
| <hr/>  |                                                    |
| P.m-2  |                                                    |
| F3     | CAACACCTGAGGTGGTTA                                 |
| B3     | CGGATCTTGTGTTATTAGATGAG                            |
| FIP    | CAGGGTCTCTTGAGAGGGGGCTAATTTTACGTTACTTCAGCAATG      |
| BIP    | TGCTGGCGGTTTATCACGAA-GCCTGATTTTTTGGCTCAT           |
| LF     | TGCCATGTTCAAGCGGTAGA                               |
| LB     | CAACACCTGAGGTGGTTA                                 |
| <hr/>  |                                                    |
| P.m-3  |                                                    |
| F3     | TGGTGCAAAAGGTGAGAT                                 |
| B3     | ATAATCTGGAAGATGACGAGTA                             |
| FIP    | TGTCACATCACAAGAACTTGACTAGTATTAATGGGCAAACCTATCACAG  |
| BIP    | TTCCCGACCAAACCGATTGAATTA-TAATGGTTTGGAGTAAAGAGAACAC |
| LF     | TCAACGTGAGATTAGTGGTGA                              |
| LB     | CATACCTTAGTACTGTCTGAAACTG                          |
| <hr/>  |                                                    |
| P.m-4  |                                                    |
| F3     | TGACAAATTTTTTCCCGACC                               |
| B3     | TGTTGCATAAACAGGGTCT                                |
| FIP    | CGCCCCTGATTTTATTAATGGTTTG-GAATTACATACCTTAGTACTGTCT |

|       |                                                |
|-------|------------------------------------------------|
| BIP   | TATCATCTATCAACACCTGAGGTGG-CCATGTTCAAGCGGTAGAC  |
| P.m-5 |                                                |
| F3    | GGGTCGATATTCTTAATATTTTTTCG                     |
| B3    | TAATTTAATGCGATGGGGATT                          |
| FIP   | ATGCCATTTACGTTGCGGATCTGATGAGCCAAAAAATCAGGC     |
| BIP   | AACGCTCTATACTACACCATCAACACTGACATCCAACAGTAATTGG |
| LF    | CGCCATTTAAGTAAAGAGGGCGT                        |

8

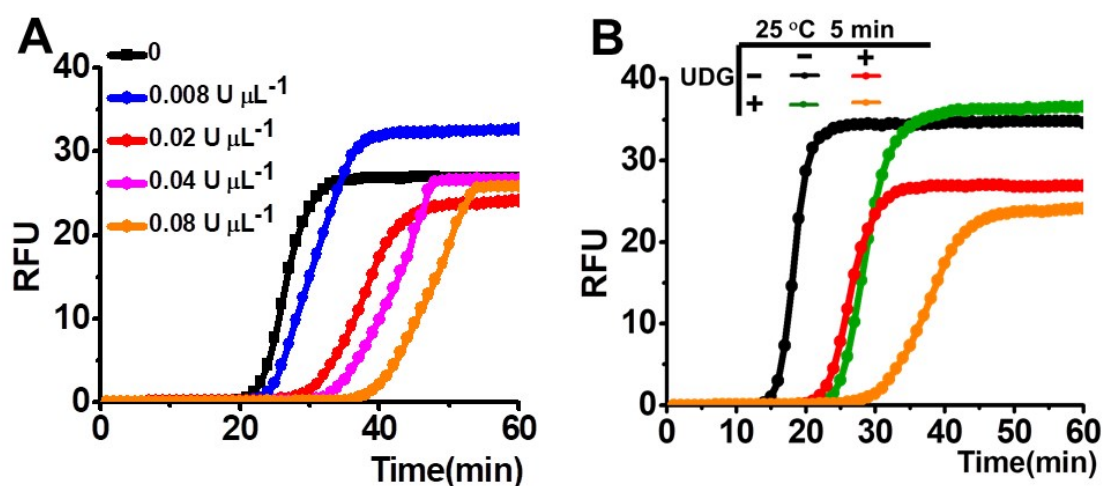

9

10 **Figure S1. (A) Optimizing the concentration of UDG. (B) Reaction efficiencies**  
 11 **were compared in case of two factors: room temperature placement and UDG.**

12

13 We carried out an experiment to optimize the concentration of UDG (Figure S1(A)).  
 14 Except for different final concentrations of UDG, the other compositions of the  
 15 reaction were the same as described in Figure 2A. The stock concentration of UDG  
 16 was 1 U μL<sup>-1</sup>. We added 0, 0.2, 0.5, 1, and 2 μL of UDG respectively to the 25 μL of  
 17 reaction mixture.

18 **Table S4. Comparison of the performances of commercial kits for nucleic acid extraction.**

| Material              | Molecule | Commercial products | Sample                   | Application         | Advantage                                     | Disadvantage                                                       | Reference |
|-----------------------|----------|---------------------|--------------------------|---------------------|-----------------------------------------------|--------------------------------------------------------------------|-----------|
| 1.FTA cards           | DNA, RNA | Whatman             | 1.2 mm punches           | 5-20 ng DNA         | Easy to use and store                         | limited amount of nucleic acid                                     | 5         |
| 2.Silica matrices     | DNA, RNA | QIAamp              | Blood (200 μL)           | 4-12 μg DNA         | High-purity DNA                               | Unable to recover small DNA fragments                              | 6         |
| 3.Magnetic bead       | DNA, RNA | TIANGEN             | Blood (100-250 μL)       | 4-8 μg DNA          | No centrifugation, best choice for automation | Interference in PCR amplification                                  | 6, 7      |
| 4.Alkaline extraction | Plasmid  | TaKaRa              | 1-4 mL of fresh bacteria | 1-20 μg Plasmid DNA | High-purity plasmid DNA                       | Containing high concentration of alkaline solutions and denaturant | 8         |

19

20 **References**

- 21 1 J. Hill, S. Beriwal, I. Chandra, V. K. Paul, A. Kapil, T. Singh, R. M. Wadowsky,  
22 V. Singh, A. Goyal, T. Jahnukainen, J. R. Johnson, P. I. Tarr and A. Vats, *J. Clin.*  
23 *Microbiol.*, 2008, **46**, 2800-2804.
- 24 2 M. Goto, K. Shimada, A. Sato, E. Takahashi, T. Fukasawa, T. Takahashi, S.  
25 Ohka, T. Taniguchi, E. Honda, A. Nomoto, A. Ogura, T. Kirikae and K. Hanaki,  
26 *J. Microbiol. Meth.*, 2010, **81**, 247-252.
- 27 3 D. Dong, W. Liu, H. Li, Y. Wang, X. Li, D. Zou, Z. Yang, S. Huang, D. Zhou, L.  
28 Huang and J. Yuan, *Front. Microbiol.*, 2015, **6**, 519-524.
- 29 4 Y. Wang, H. Li, Y. Wang, L. Zhang, J. Xu and C. Ye, *Front. Microbiol.*, 2017, **8**,  
30 192-205.
- 31 5 H. Y. Wong, E. S. S. Lim and W. F. Tan-Siew, *Forensic Science International:*  
32 *Genetics*, 2012, **6**, 176-179.
- 33 6 N. Ali, R. Rampazzo, A. Costa and M. A. Krieger, *Biomed Res. Int.*, 2017, **2017**,  
34 1-13.
- 35 7 <http://www.tiangen.com/>
- 36 8 <https://www.takarabiomed.com.cn/>
